# Supplementary material
Source: publisher figshare collection journal article supplement (https://acs.figshare.com/ndownloader/files/9329881)
Supplement: Supplementary file 1 [file 9329881]

## SUPPORTING INFORMATION

Trace material capture by controlled liquid droplets on a  
superhydrophobic/hydrophilic surface

Kenta Fukada<sup>†</sup>, Naoya Kawamura<sup>‡</sup> and Seimei Shiratori<sup>\*†‡</sup>

**Affiliations:**

<sup>†</sup>Center for Material Design Science, School of Integrated Design Engineering,  
Keio University, 3-14-1 Hiyoshi, Kohoku-ku, Yokohama, Kanagawa 223-8522,  
Japan

<sup>‡</sup>Department of Applied Physics and Physico-Informatics, Faculty of Science and  
Technology, Keio University, 3-14-1 Hiyoshi, Kohoku-ku, Yokohama, Kanagawa  
223-8522, Japan

**Corresponding Author:** shiratori@appi.keio.ac.jp

## Table of Contents for Supporting Information.

Figure S1 Murexide reaction

Figure S2 Contact angle during evaporation on a superhydrophobic surface

Figure S3. Enhanced color intensity by condensing enrichment effect

Figure S4. Difference of evaporation behavior on the various surface

Figure S5. The effect of liquid volume for condensing enrichment effect

Figure S6. A trace substance detector without a flow path

Figure S7. The effect of width of flow path

Figure S8. FT-IR spectra of caffeine after color reaction

Figure S9. FT-IR spectra of abacavir (ABC)

Figure S10. Color sample for estimating caffeine concentration

Figure S11. Calibration curve by multivariate analysis

Figure S12. Comparison of High Performance Liquid Chromatography(HPLC) and this work

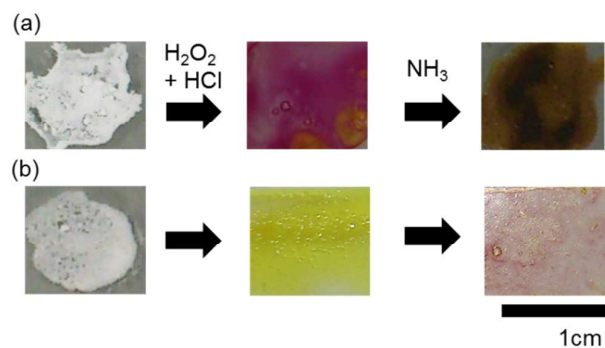

Figure S1 Murexide reaction

(a) Color change of murexide reaction with caffeine. (b) Abacavir which had similar structure with caffeine was also changed from white to yellow or red. Only reaction with  $H_2O_2$  and HCl was utilized in order to simplify the detection procedure.

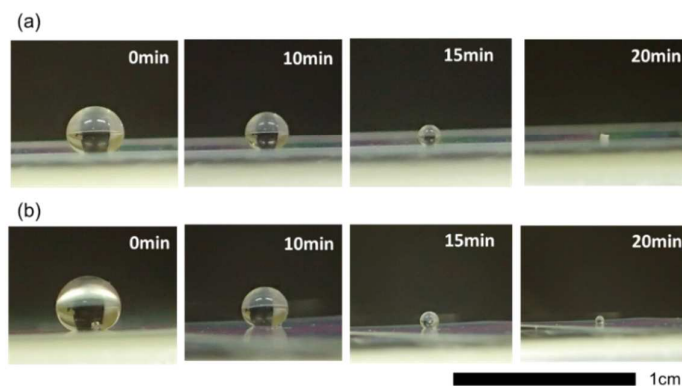

Figure S2 Contact angle during evaporation on a superhydrophobic surface

(a) PVA/SiO<sub>2</sub> 10µl was condensed on a superhydrophobic surface for fabricating hydrophilic spot area. (b) Aqueous liquid droplet 10µl was condensed on a superhydrophobic / hydrophilic patterned surface. Water repellent property was kept until the end of full evaporation.

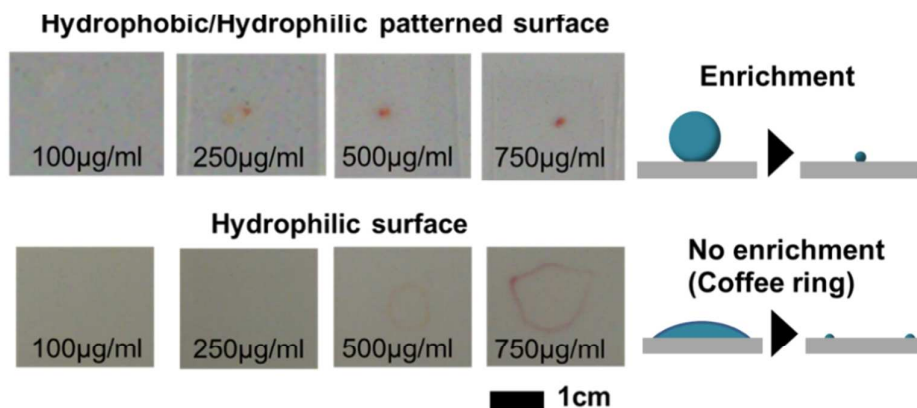

Figure S3. Enhanced color intensity by condensing enrichment effect

Superhydrophobic / hydrophilic patterned surface showed excellent detection performance due to the enrichment effect of superhydrophobic surface. On the other hand, coffee ring was observed on hydrophilic surface and it was difficult to estimate the concentration especially at low concentration regions.

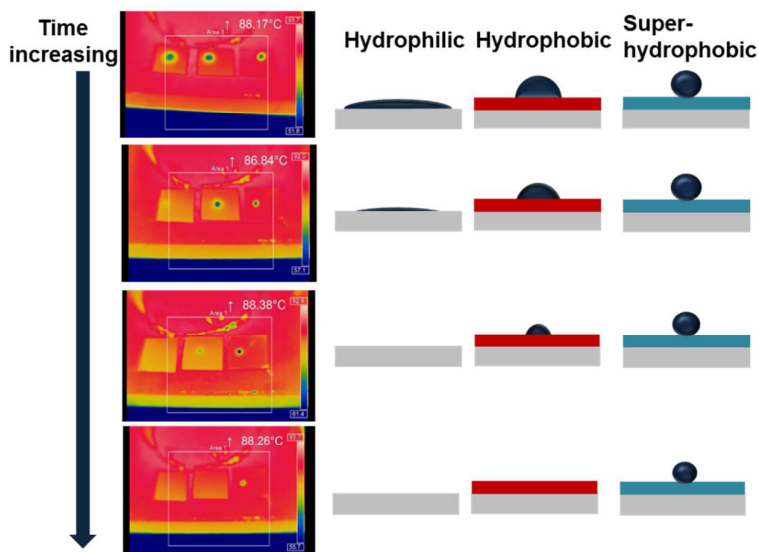

Figure S4. Difference of evaporation behavior on the various surface

During heating process at 85-90°C, liquid component was rapidly evaporated in the case of hydrophilic surface. On the other hand, it took long time for removing a liquid droplet on the superhydrophobic surface.

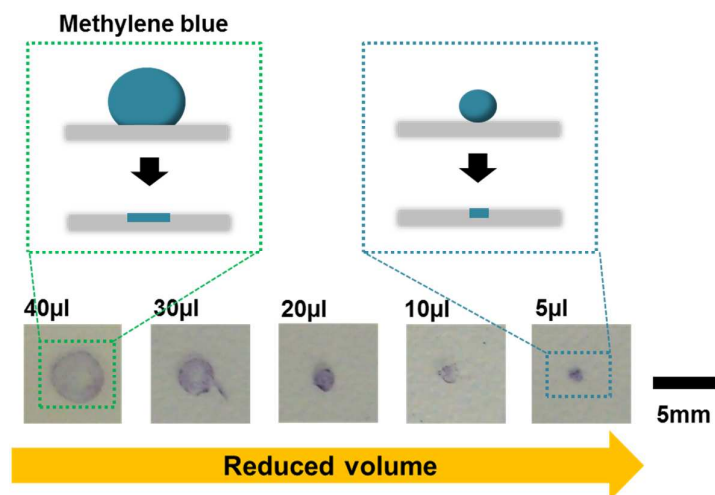

Figure S5. The effect of liquid volume for condensing enrichment effect

Various quantities of aqueous liquids colored by methylene blue were dried on the superhydrophobic / hydrophilic patterned surface and the contact area was investigated. By reducing liquid volume, the contact area was also decreased.

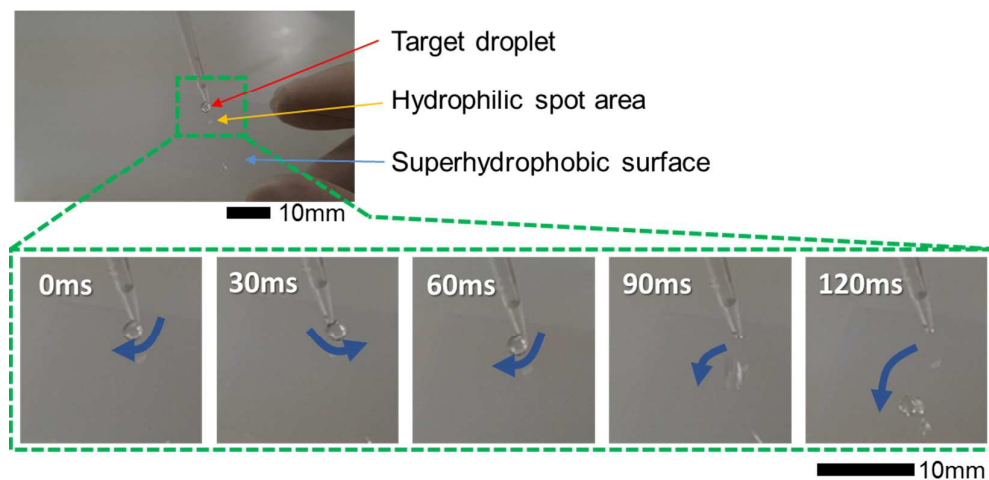

Figure S6. A trace substance detector without a flow path

It was difficult to precisely control a liquid droplet on a specific hydrophilic spot area surrounded by superhydrophobic surfaces because hand tremors caused the liquid to sway back and forth at the pipette.

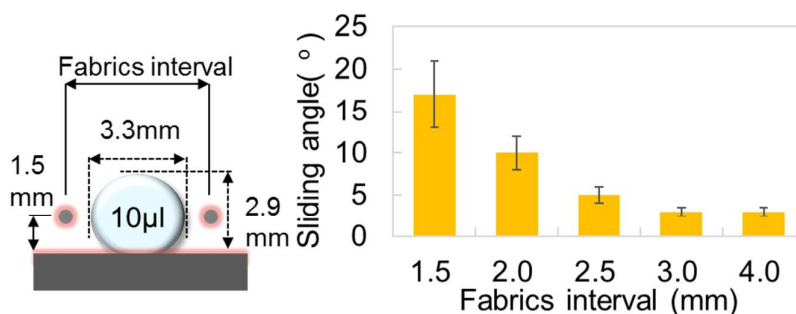

Figure S7. The effect of width of flow path

In the case of fabrics intervals with over or around the diameters of a liquid droplet, sliding behavior was not hindered by the fabrics guides due to its superhydrophobicity. On the other hand, narrow interval led to the high sliding angles.

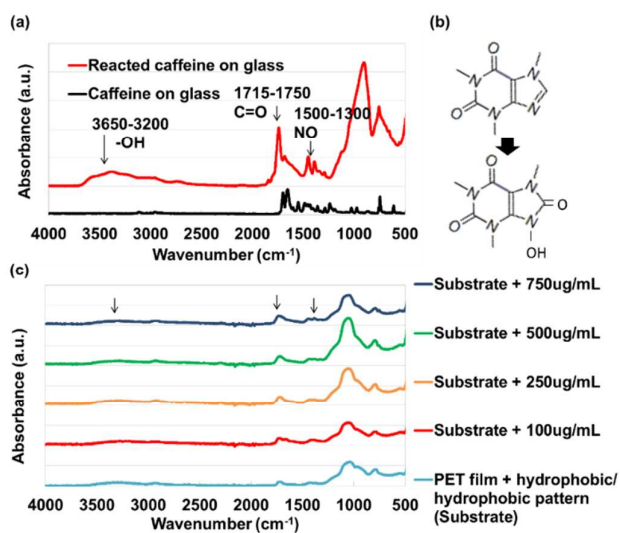

Figure S8. FT-IR spectra of caffeine after color reaction

(a) Caffeine with or without reaction of H<sub>2</sub>O<sub>2</sub> / HCl on glass substrate showed the different peaks. (b) One of the chemical structure of red products cited from Ref 29. (c) Caffeine with or without reaction of H<sub>2</sub>O<sub>2</sub> / HCl on a superhydrophobic / hydrophilic patterned film.

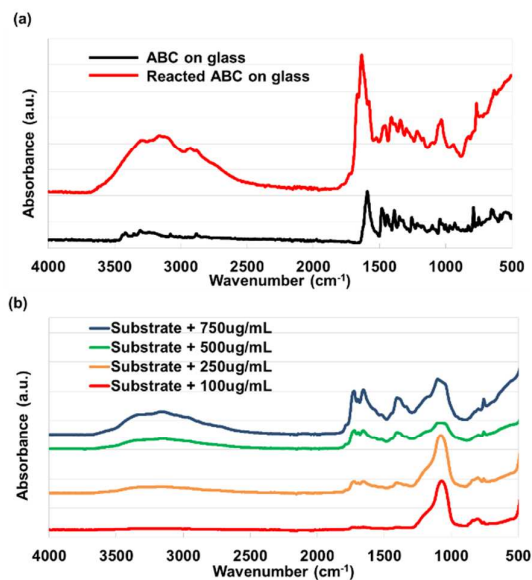

Figure S9. FT-IR spectra of abacavir (ABC)

Abacavir reacted with  $H_2O_2$  and HCl was analyzed by FT-IR spectra. As same with the case of caffeine, the change of chemical structure was observed.

|                                                                                                 | 100µg/ml                                                                            | 250µg/ml                                                                            | 500µg/ml                                                                             | 750µg/ml                                                                              |
|-------------------------------------------------------------------------------------------------|-------------------------------------------------------------------------------------|-------------------------------------------------------------------------------------|--------------------------------------------------------------------------------------|---------------------------------------------------------------------------------------|
| Caffeine<br> |  |  |  |  |
| Color sample                                                                                    |  |  |  |  |

Figure S10. Color sample for estimating caffeine concentration

Redness of condensed caffeine with oxidation was gradually increased. Concentration of caffeine was easily estimated through color sample with naked eye observation.

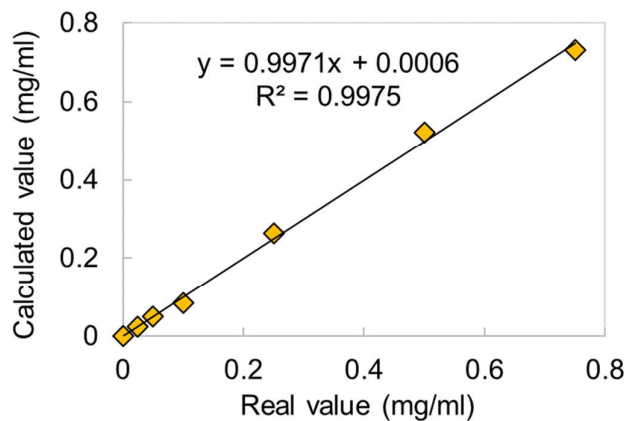

Figure S11. Calibration curve by multivariate analysis

Concentration of caffeine was calculated with the FT-IR data and optical value from Figure 7(a) by multivariate analysis. The calibration formula was as follows;

$$\text{Calc. value} = -0.82 + 18.05 * \textcircled{1} + 9.70 * \textcircled{2} + (-4.91) * \textcircled{3} + 0.013 * \textcircled{4} + 0.166 * \textcircled{5}$$

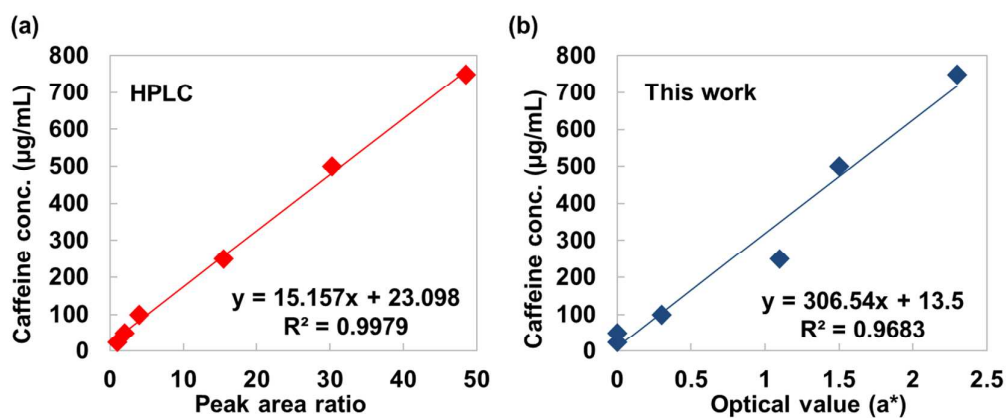

Figure S12. Comparison of high performance liquid chromatography (HPLC) and this work. A commercial HPLC was used to estimate the caffeine concentration. Although HPLC had higher reliability and a large measuring range, this work also had high reliability with an easy and convenient method. The HPLC had stationary phase: ODS, mobile phase: methanol/water=80/20, column temperature=40°C, flow speed=0.5ml/min, measurement wavelength=254nm.
